# Supplementary material for: The Role of Cullin-RING Ligases in Striated Muscle Development, Function, and Disease
Source: MDPI journal article supplement (doi:10.3390/ijms21217936), 2020-10-26

**Supplemental File 2** - unmodified immunoblot images for blots shown in Figure 7.

**Blots shown in Figure 7B**

(antibodies and sample loading is marked on the blots; please note that the order of samples is reversed; +/- indicates the first sample: +/- cre-; arrow indicates bands shown in the figure )

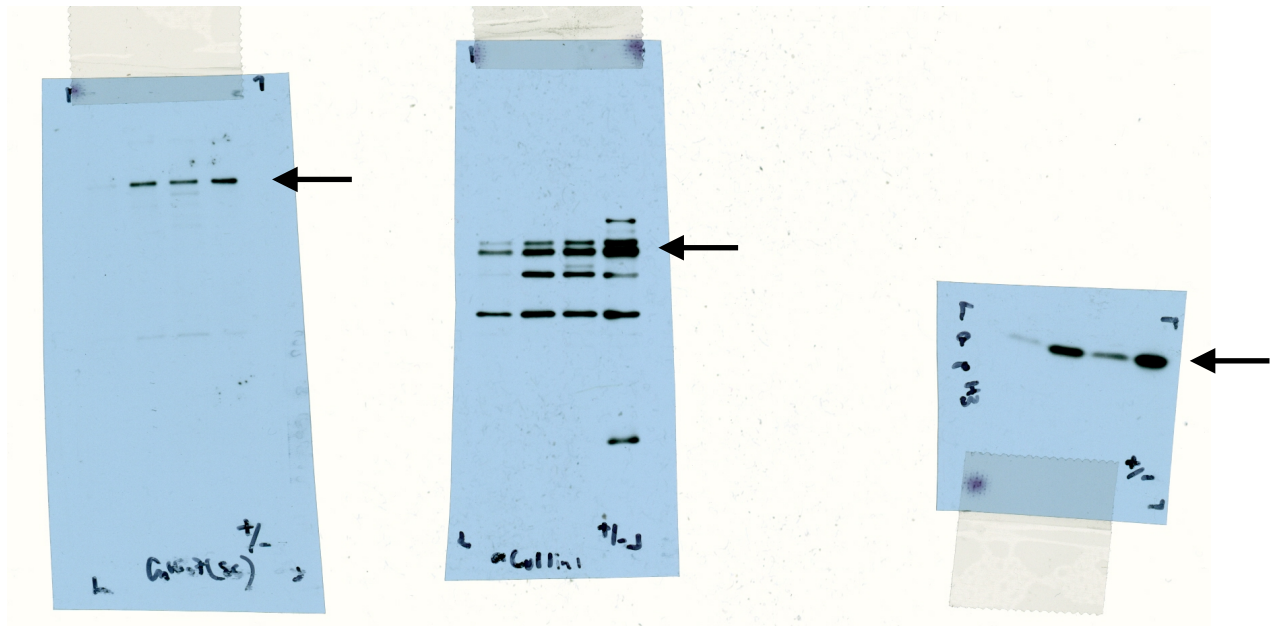

**Blots shown in Figure 7F**

(antibodies and sample loading is marked on the blots; arrow indicates bands shown in the figure and directionality of sample loading)

- Cullin 1

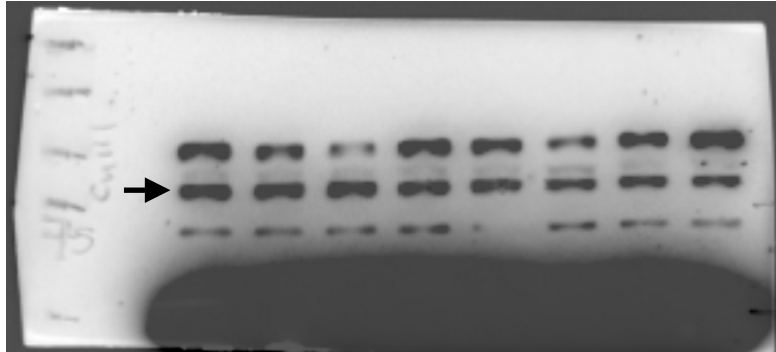

- Cullin 3

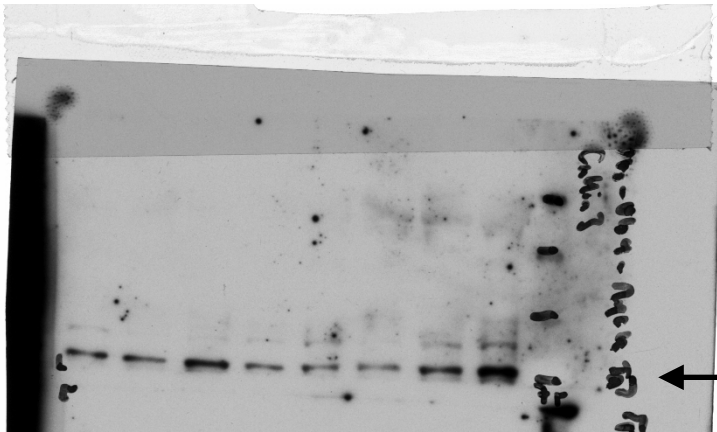

- Cullin 7  
please note, first lane is the molecular weight marker

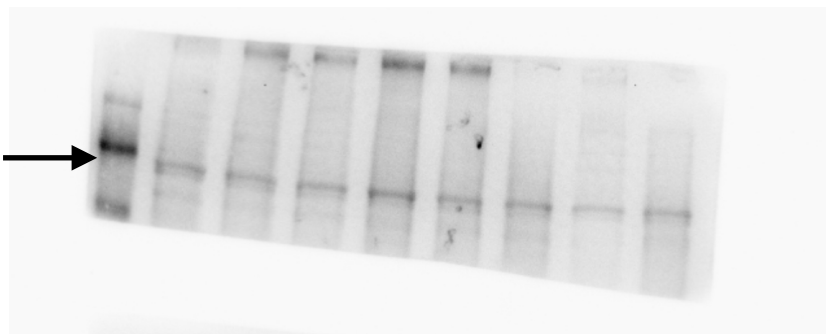

Supplement: s1 [file s1]
