# Supplementary material for: The Role of Cullin-RING Ligases in Striated Muscle Development, Function, and Disease
Source: Int J Mol Sci. 2020 Oct 26;21(21):7936. doi: 10.3390/ijms21217936 (PMC7672578; doi:10.3390/ijms21217936)
Supplement: Supplementary file 1 [file ijms-21-07936-s001.zip › Supplemental File 1.xlsx]

## Sheet: Summary
	sheet		content
	Fbox proteins		F-box domain sequences of human F-box proteins
	BTB-domain proteins		BTB-domain sequences of human BTB-domain containing proteins
	Cullin proteins		CH-domain sequences of human Cullin proteins
	Cullin2-5 substrate adapters		List of putative and bona-fide Cullin-2 and Cullin-5 substrate adapters
	Cullin-4 substrate adapters		List of putative and bona-fide Cullin-4A/B substrate adapters

## Sheet: Fbox proteins
	gene	alt names	F-box domain
	CCNA	CYCLIN A/CDK2-ASSOCIATED P45	WDSLPDELLLGIFSCLCLPELLKVSGVCKRWYRLASDESLWQTLDLT
	FBXO1	CCNF, CYCLIN F	LPEDVLFHILKWLSVEDILAVRAVHSQLKDLVDNHASVWAC
	FBXL1	FBL1, SKP2	LPDELLLGIFSCLCLPELLKVSGVCKRWYRLASDESLWQTL
	FBXL10	FBL10, KDM2B, LYSINE-SPECIFIC DEMETHYLASE 2B, JEMMA, CXXC2	MHREVWMAVFSYLSHQDLCVCMRVCRTWNRWCCDKRLWTRI
	FBXL11	FBL11, KDM2A, CXXC8	MQREVWMSVFRYLSRRELCECMRVCKTWYKWCCDKRLWTKI
	FBXL12	FBL12	LPDSVLLEIFSYLPVRDRIRISRVCHRWKRLVDDRWLWRH
	FBXL13	FBL13	SLLPERAILQIFFYLSLKDVIICGQVNHAWMLMTQLNSLWNAID
	FBXL14	FBL14, FXL14	LFPELLAMIFGYLDVRDKGRAAQVCTAWRDAAYHKSVWRGV
	FBXL16	FBL16	EKILNGLFWYFSACEKCVLAQVCKAWRRVLYQPKFWAGL
	FBXL18	FBL18	FSDEILLHILSHVPSTDLILNVRRTCRKLAALCLDKSLIHTV
	FBXL19	FBL19, FXL19, CXXC11	LPRAAWLRVFQHLGPRELCICMRVCRTWSRWCYDKRLWPRM
	FBXL2	FBL2	LPKELLLRIFSFLDIVTLCRCAQISKAWNILALDGSNWQRIDL
	FBXL20	FXL20	LPKELLLRIFSFLDVVTLCRCAQVSRAWNVLALDGSNWQRI
	FBXL21	FXL21, FBL3, FBXL3B	LPHHVVLQIFQYLPLLDRACASSVCRRWNEVFHISDLWRKF
	FBXL22	FBL22, FXL22	QLNRECLLHLFSFLDKDSRKSLARTCSQLHDVFEDPALWSLLHFR
	FBXL3	FBL3	LLQDIILQVFKYLPLLDRAHASQVCRNWNQVFHMPDLWRCF
	FBXL4	FBL4	FDKLPYELIQLILNHLTLPDLCRLAQTCKLLSQHCCDPL
	FBXL5	FBL5	LPPEVMLSIFSYLNPQELCRCSQVSMKWSQLTKTGSLWKHL
	FBXL6	FBL6	DRIPLEILVQIFGLLVAADGPMPFLGRAARVCRRWQEAASQPALWHTVTLS
	FBXL7	FBL7	LPDHSMVQIFSFLPTNQLCRCARVCRRWYNLAWDPRLWRTI
	FBXL8	FBL8	LPEEVLALIFRHLSLRDRAAAARVCRAWAAAATCSAVWHDT
	FBXL9	FBL9, LRRC29	HCSRLSDKGWAQAASSWPRLQHLNLSSCSQLIEQTLDAIGQACRQLR
	FBXO10	FBX10	LPLELWRMILAYLHLPDLGRCSLVCRAWYELILSLDSTRWRQL
	FBXO11	FBX11	QYLQEKLPDEVVLKIFSYLLEQDLCRAACVCKRFSELANDPILWKRLY
	FBXO12	FBXO35, FBXW12, FBW12	LPDLALKRIFSFLDLFGLLQVSQVNKHWNRIADSDYLWRSL
	FBXO13	FBX13, FBXL17, FBL17	LPPSILLKIFSNLSLDERCLSASLVCKYWRDLCLDFQFWKQL
	FBXO15	FBX15	MPSEILLKIFSYLDAVSLLCTGCVSRRFYHLANDNFIWIGI
	FBXO16	FBX16	LPRVLSLYIFSFLDPRSLCRCAQVCWHWKNLAELDQLWMLK
	FBXO17	FBX17, FBXO26, FBG4	LDALPPELLVQVLSHVPPRSLVTRCRPVCRAWRDIVDGPTVW
	FBXO18	FBX18, FBH1	LPSEVLRHVFAFLPVEDLYWNLSLVCHLWREIISDPLFIPWKKL
	FBXO2	FBX2, FBG1	LDELPEPLLLRVLAALPAAELVQACRLVCLRWKELVDGAPLWLLKC
	FBXO21	FBX21	VNLPGEVLEYILCCGSLTAADIGRVSSTCRRLRELCQSSGKVWKEQF
	FBXO22	FBX22	LAEVVERVLTFLPAKALLRVACVCRLWRECVRRVLRTHR
	FBXO24	FBX24 (WRONGLY ANNOTATED IN MOUSE AS IKKA?)	FPPELVEHIISFLPVRDLVALGQTCRYFHEVCDGEGVWRRI
	FBXO25	FBX25	PLHMLNNILYRFSDGWDIITLGQVTPTLYMLSEDRQLWKKL
	FBXO27	FBX27	LPPELLLVVLSHVPPRTLLGRCRQVCRGWRALVDGQALWLLI
	FBXO28	FBX28	TLVALPIVAIENILSFMSYDEISQLRLVCKRM
	FBXO29	FBXW8, FBW8	LPYELAINIFQYLDRKELGRCAQVSKTWKVIAEDEVLWYRL
	FBXO3	FBX3	LPTDPLLLILSFLDYRDLINCCYVSRRLSQLSSHDPLWRRH
	FBXO30	FBX30	LPFEVLQHIAGFLDGFSLCQLSCVSKLMRDVCGSLLQSR
	FBXO31	FBX31, FBX14, FBXO14	LPPELLVEIFASLPGTDLPSLAQVCTKFRRILHTDTIWRRR
	FBXO32	MAFBX, ATROGIN	PLCLQLNIMQRLSDGRDLVSLGQAAPDLHVLSEDRLLWKKL
	FBXO33	FBX33	LPSELIVHIFSFLPAPDRLRASASCSHWRECLFYPALWPQL
	FBXO34	FBX34	LPHHIMVKIFRLLPTKSLVALKCTCCYFKFIIEYYNIRPAD
	FBXO36	FBX36	LSDDLLLTIISYLDLEDIARLCQTSHRFAKLCMSDKLWEQI
	FBXO37	FBL15, FBXL15	LPWEDVLLPHVLNRVPLRQLLRLQRVSRAFRSLVQLHLAGLRR
	FBXO38	FBX38	YMNQLSHEVLCHIFRYLPLQDIMCMECLSRKLKEAVTL
	FBXO39	FBX39	LPDLCLCRVFWWLGDRDRSRAALVCRKWNQMMYSAELWRYR
	FBXO4	FBX4	LPIDVQLYILSFLSPHDLCQLGSTNHYWNETVRDPILWRYF
	FBXO40	FBX40	LTSLPLEILKYIAGFLDSVSLAQLSQVSVLMRNICATLLQERGMVLLQWKKKRYSHGGTSWRVHREIWQFSSLFSKIKSWEFNEVTSMSEHLKSCPFNIVEHKTDPILL
	FBXO41	FBX41	AALFCIFTYLDTRTLLHAAEVCRDWRFVARHPAVWTRVLLE
	FBXO42	FBX42	LPEEVLEYILSFLSPYQEHKTAALVCKQWYRLIKGVAHQCY
	FBXO43	FBX43	HILAMVLESLTAESLCSVWKVSRNWREIVVQDKNANRRRK
	FBXO44	FBX44 FBX30, FBG3	LPENILLELFTHVPARQLLLNCRLVCSLWRDLIDLVTLWKRK
	FBXO45	FBX45, FBSP1	LPSRVLELVFSYLELSELRSCALVCKHWYRCLHGDENSEVWRSL
	FBXO46	FBX46, FBXO34L	LPEHVLVKIFSFLPTRALAALKCTCHHFKGIIEAFGVRATD
	FBXO47		NFKALPLEIFQIILKYLSVKDISMLSMVSKTVSQHIIN
	FBXO48	FBX48	LPAEITFKIFSQLDIRSLCRASLTCRSWNDTIRNSDSLWKPH
	FBXO49	ECT2L, HCG2030359	LPRFISLYIFSFLSPKDLCAAAQVSWPWKFLTEQDCLWMPK
	FBXO5	FBX5	ECVDILSELFRRGLRHVLATILAQLSDMDLINVSKVSTTWKKILEDDKGAFQLY
	FBXO6	FBX6, FBG2	LPENILLELFTHVPARQLLLNCRLVCSLWRDLIDLMTLWKRK
	FBXO7	FBX7	LPLELKLRIFRLLDVRSVLSLSAVCRDLFTASNDPLLWRFL
	FBXO8	FBX8	LEMLPPELSFTILSYLNATDLCLASCVWQDLANDELLWQGLCKS
	FBXO9	FBX9	ISVLPMEVLMYIFRWVVSSDLDLRSLEQLSLVCRGFYICARDPEIWRLACLK
	FBXW1	FBW1A, B-TRCP	LDHIAENILSYLDAKSLCAAELVCKEWYRVTSDGMLWKKL
	FBXW10	FBW10	FIRYLPIHLSKYILRMLDRHTLNKCASVSQHWAAMAQQVKMDLSAHG
	FBXW11	FBW11, FBW1B, B-TRCP2	LDHIAENILSYLDARSLCAAELVCKEWQRVISEGMLWKKL
	FBXW13		LPSVPLMKIFSYLDAYSLLQAAQVNKDWNELASSDVLWRRL
	FBXW2	FBW2, MD6A/MD6B	LPLELSFYLLKWLDPQTLLTCCLVSKQWNKVISACTEVWQT
	FBXW3	FBW3	LWRLPEVLLLHMCSYLDMRALGRLAQVYRWLWHFTNCDLLRRQI
	FBXW4	FBW4, DACTYLIN	GPALWRLPEELLLLICSYLDMRALGRLAQVCRWLRRFTSCDLLWRRI
	FBXW5	FBW5	LPDSLVYQIFLSLGPADVLAAGLVCRQWQAVSRDEFLWREQ
	FBXW7	FBW7, SEL10, FBXW6	LPKELALYVLSFLEPKDLLQAAQTCRYWRILAEDNLLWREK
	FBXW9	FBW9	LPPELLLEICSYLDARLVLHVLSRVCHALRDLVSDHVTWRLR

## Sheet: BTB-domain proteins
	note: some putative Cullin-3 adapter proteins contain multiple BTB-domains, the N-terminal BTB-domain was chosen for sequence alignment
	note: there are no discerneable BTB-domains in BTBD16
	gene	alt names	BTB-domain region
	BTBD1		SDVRFVLGKGRGAAAAGGPQRIPAHRFVLAAGSAVFDAMFNGGMATTSAEIELPDVEPAAFLALLRFLYSDEVQIGPETVMTTLYTAKKYAVPALEAHCVEFLTKHL
	BTBD2		CDVHFLVGKGLSSQRIPAHRFVLAVGSAVFDAMFNGGMATTSTEIELPDVEPAAFLALLKFLYSDEVQIGPETVMTTLYTAKKYAVPALEAHCVEFLKKNL
	BTBD3		MFNNDLMADVHFVVGPPGGTQRLPGHKYVLAVGSSVFHAMFYGELAEDKDEIRIPDVEPAAFLAMLKYIYCDEIDLAADTVLATLYAAKKYIVPHLARACVNFLETSL
	BTBD6		ADVHFVVGPPGATRTVPAHKYVLAVGSSVFYAMFYGDLAEVKSEIHIPDVEPAAFLILLKYMYSDEIDLEADTVLATLYAAKKYIVPALAKACVNFLETSL
	BTBD7		TDVDLIFQETCFPVHRAILAARCPFFKTLLSSSPEYGAEIIMDINTAGIDMPMFSALLHYLYTGEFGMEDSRFQNVDILVQLSEEFGTPNSLDVDMRGLFDYM
	BTBD8		TDVTFSVGCTLFKAHKAVLLARVPDFYFHTIGQTSNSLTNQEPIAVENVEALEFRTFLQIIYSSNRNIKNYEEEILRKKIMEIGISQKQLDISFPKCENSSDCSL
	BTBD9		GDVTFVVEKKRFPAHRVILAARCQYFRALLYGGMRESQPEAEIPLQDTTAEAFTMLLKYIYTGRATLTDEKEEVLLDFLSLAHKYGFPELEDSTSEYLCTIL
	BTBD10	BTBDA	ERVTLIVDNTRFVVDPSIFTAQPNTMLGRMFGSGREHNFTRPNEKGEYEVAEGIGSTVFRAILDYYKTGIIRCPDGISIPELREACDYLCISFEYSTIKCRDLSAL
	BTBD11	BTBDB	SDVTFLVEGRPFYAHKVLLFTASPRFKALLSSKPTNDGTCIEIGYVKYSIFQLVMQYLYYGGPESLLIKNNEIMELLSAAKFFQLEALQRHCEIICAKSI
	BTBD12	SLX4	FGAMVNNPHLSDVQFQTDSGEVLYAHKFVLYARCPLLIQYVNNEGFSAVEDGVLTQRVLLGDVSTEAARTFLHYLYTADTGLPPGLSSELSSLAHRFGVSELVHLCEQ
	BTBD13	GMCL1	SDIKICALGEEWSLHKIYLCQSGYFSSMFSGSWKESSMNIIELEIPDQNIDVEALQVAFGSLYRDDVLIKPSRVVAILAAACLLQLDGLIQQCGETMKETV
	BTBD14	NACC2, BTBD31	CDVSIVVKGQAFKAHRAVLAASSLYFRDLFSGNSKSAFELPGSVPPACFQQILSFCYTGRLTMTASEQLVVMYTAGFLQIQHIVERGTDLMFKVS
	BTBD15	ZBTB44	LNMLRNDGHFCDITIRVQDKIFRAHKVVLAACSDFFRTKLVGQAEDENKNVLDLHHVTVTGFIPLLEYAYTATLSINTENIIDVLAAASYMQMFSVASTCSEFMKSSI
	BTBD17	BTBDH	SDVVLRVQAAGTDEVRVFHAHRLLLGLHSELFLELLSNQSEAVLQEPQDCAAVFDKFIRYLYCGELTVLLTQAIPLHRLATKYGVSSLQRGVADYMRAHL
	BTBD18	BTBDI	CDVLLQAEGEAVPAHCCILSACSPFFTERLERERPAQGGKVVLELGGLKISTLRKLVDFLYTSEMEVSQEEAQDVLSAARQLRVSELESLQLEGGKLVK
	BTBD19	BTBDJ	SDVCFVVGQERQEVFAHRCLLACRCNFFQRLLGTEPGPGVPSPVVLSTVPTEAFLAVLEFLYTNSVKLYRHSVLEVLTAAVEYGLEELRELCLQFVVKVL
	BTBD20	KBTBD14, CCIN	LNRQRKRKEYWDMALSVDNHVFFAHRNVLAAVSPLVRSLISSNDMKTADELFITIDTSYLSPVTVDQLLDYFYSGKVVISEQNVEELLRGAQYFNTPRLRVHCNDFLIKSI
	BTBD21	ABTB1	SDVVFVVHGKPFRVHRCVLGARSAYFANMLDTKWKGKSVVVLRHPLINPVAFGALLQYLYTGRLDIGVEHVSDCERLAKQCQLWDLLSDLEAKCEKVS
	BTBD22	ABTB2	SDVTFLVEGKLFYAHKVLLVTASNRFKTLMTNKSEQDGDSSKTIEISDMKYHIFQMMMQYLYYGGTESMEIPTTDILELLSAASLFQLDALQRHCEILCSQTL
	BTBD23	ANKFY1	DLYEQEQYSDLKIKVGDRHISAHKFVLAARSDSWSLANLSSTKELDLSDANPEVTMTMLRWIYTDELEFREDDVFLTELMKLANRFQLQLLRERCEK
	BTBD24	BACH1	CDVTIFVEGQRFRAHRSVLAACSSYFHSRIVGQADGELNITLPEEVTVKGFEPLIQFAYTAKLILSKENVDEVCKCVEFLSVHNIEESCFQFLKFKF
	BTBD25	BACH2	CDVTLIVERKEFRAHRAVLAACSEYFWQALVGQTKNDLVVSLPEEVTARGFGPLLQFAYTAKLLLSRENIREVIRCAEFLRMHNLEDSCFSFLQTQL
	BTBD26	IBTK	HDVTFQVGNRLFPAHKYILAVHSDFFQKLFLSDGNTSEFTDIYQKDEDSAGCHLFVVEKVHPDMFEYLLQFIYTDTCDFLTHGFKPRIHLNKNPEEYQGTLNSHLNKVNFHEDDNQKSAFEVYKSNQAQTVSERQKSKPKSCKKGKNIREDDPVRMLQTVAKKFDFSNLSSRLDGVRFENE
	BTBD29	LZTR1	EFCDITLLLDGHPRPAHKAILAARSSYFEAMFRSFMPEDGQVNISIGEMVPSRQAFESMLRYIYYGEVNMPPEDSLYLFAAPYYYGFYN
	BTBD30	NACC1	CDVSVVVKGHAFKAHRAVLAASSSYFRDLFNNSRSAVVELPAAVQPQSFQQILSFCYTGRLSMNVGDQFLLMYTAGFLQIQEIMEKGTEFFLKVS
	BTBD32	SPOP	TDCCLCVAGQEFQAHKAILAARSPVFSAMFEHEMEESKKNRVEINDVEPEVFKEMMCFIYTGKAPNLDKMADDLLAAADKYALERLKVMCEDALCSNL
	BTBD33	SPOPL	TDCSFFVRGQEFKAHKSVLAARSPVFNAMFEHEMEESKKNRVEINDLDPEVFKEMMRFIYTGRAPNLDKMADNLLAAADKYALERLKVMCEEALCSNL
	BTBD34	TNFAIP1	VQLNVGGSLYYTTVRALTRHDTMLKAMFSGRMEVLTDKEGWILIDRCGKHFGTILNYLRDDTITLPQNRQEIKELMAEAKYYLIQGL
	GMCL2	GMCL1L	SDIKICALGEEWRLHKIYLCQSGYFSSMFSGSWKESSMNIIELEIPDQNIDVDALQVAFGSLYRDDVLIKPSRVVAILAAACMLQLDGLIQQCGETMKETI
	KBTBD2		DERQINTEYAVSLLEQLKLFYEQQLFTDIVLIVEGTEFPCHKMVLATCSSYFRAMFMSGLSESKQTHVHLRNVDAATLQIIITYAYTGNLAMNDSTVEQLYETACFLQVEDVLQRCREYLIKKINAENCVRLL
	KBTBD3		FLVSEDHGQKILSVLQNFREQNVFYDFKIIMKDEIIPCHRCVLAACSDFFRAMFEVNMKERDDGSVTITNLSSKAVKAFLDYAYTGKTKITDDNVEMFFQLSSFLQVSFLSKACSDFLIKSINLVNCLQL
	KBTBD4		LEEELFADVTISVEGREFQLHRLVLSAQSCFFRSMFTSNLKEAHNRVIVLQDVSESVFQLLVDYIYHGTVKLRAEELQEIYEVSDMYQLTSLFEECSRFL
	KBTBD6		CDVTIEVVTPGSGPGTGRLFPCNRNVLAAACPYFKSMFTGGMYESQQASVTMHDVDAESFEVLVDYCYTGRVSLSEANVERLYAASDMLQLEYVREACASFLARRL
	KBTBD7		CDVTIEVVTPGSGPGTGRLFSCNRNVLAAACPYFKSMFTGGMYESQQASVTMHDVDAESFEVLVDYCYTGRVSLSEANVQRLYAASDMLQLEYVREACASFLARRL
	KBTBD8	TAKRP	TDIVVEVDHGKTFSCHRNVLAAISPYFRSMFTSGLTESTQKEVRIVGVEAESMDLVLNYAYTSRVILTEANVQALFTAASIFQIPSIQDQCAKYMISHL
	KBTBD11		PDLVLEVSGRRLRAHKAVLAARSDYFRARASRDVLRVQGVSLTALRLLLADAYSGRMAGVRPDNVAEVVAGARRLQLPGAAQRATDAVGPQL
	KBTBD12		IDVVLTAEGEKFPCHRLVLAAFSPYFKAMFTCGLLECNQREVILYDITAESVSVLLNYMYNAALEINNANVQTVAMAAYFMQMEEVFSVCQKYMMDHM
	KBTBD13		TLVQVWVGGQLFQADRALLVEHCGFFRGLFRSGMRETRAAEVRLGVLSAGGFRATLQVLRGDRPALAAEDELLQAVECAAFLQAPALARFLEHNLTSDN
	KCNA10	KCN1	QRVIINIAGLRFETQLRTLSQFPETLLGDREKRMQFFDSMRNEYFFDRNRPSFDGILYYYQSGGKIRRPANVPIDIFADEISFYELGSEAMDQFREDEGFI
	KCNA1		ERVVINISGLRFETQLKTLAQFPNTLLGNPKKRMRYFDPLRNEYFFDRNRPSFDAILYYYQSGGRLRRPVNVPLDMFSEEIKFYELGEEAMEKFREDEGFI
	KCNA2		ERVVINISGLRFETQLKTLAQFPETLLGDPKKRMRYFDPLRNEYFFDRNRPSFDAILYYYQSGGRLRRPVNVPLDIFSEEIRFYELGEEAMEMFREDEGYI
	KCNA3		ERVVINISGLRFETQLKTLCQFPETLLGDPKRRMRYFDPLRNEYFFDRNRPSFDAILYYYQSGGRIRRPVNVPIDIFSEEIRFYQLGEEAMEKFREDEGFL
	KCNA4	KCNA8, KCNQ1	ERVVINVSGLRFETQMKTLAQFPETLLGDPEKRTQYFDPLRNEYFFDRNRPSFDAILYYYQSGGRLKRPVNVPFDIFTEEVKFYQLGEEALLKFREDEGFV
	KCNA5		QRVHINISGLRFETQLGTLAQFPNTLLGDPAKRLRYFDPLRNEYFFDRNRPSFDGILYYYQSGGRLRRPVNVSLDVFADEIRFYQLGDEAMERFREDEGFI
	KCNA6		ERLVINISGLRFETQLRTLSLFPDTLLGDPGRRVRFFDPLRNEYFFDRNRPSFDAILYYYQSGGRLRRPVNVPLDIFLEEIRFYQLGDEALAAFREDEGCL
	KCNA7		ERLVLNVAGLRFETRARTLGRFPDTLLGDPARRGRFYDDARREYFFDRHRPSFDAVLYYYQSGGRLRRPAHVPLDVFLEEVAFYGLGAAALARLREDEGCP
	KCNB1		RRVRLNVGGLAHEVLWRTLDRLPRTRLGKLRDCNTHDSLLEVCDDYSLDDNEYFFDRHPGAFTSILNFYRTGRLHMMEEMCALSFSQELDYWGIDEIYLESCCQARYHQK
	KCNB2		RRVKINVGGLNHEVLWRTLDRLPRTRLGKLRDCNTHESLLEVCDDYNLNENEYFFDRHPGAFTSILNFYRTGKLHMMEEMCALSFGQELDYWGIDEIYLESCCQARYHQK
	KCNC1		IVINVGGTRHQTYRSTLRTLPGTRLAWLAEPDAHSHFDYDPRADEFFFDRHPGVFAHILNYYRTGKLHCPADVCGPLYEEELAFWGIDETDVEPC
	KCNC2		ERVILNVGGTRHETYRSTLKTLPGTRLALLASSEPPGDCLTTAGDKLQPSPPPLSPPPRAPPLSPGPGGCFEGGAGNCSSRGGRASDHPGGGREFFFDRHPGVFAYVLNYYRTGKLHCPADVCGPLFEEELAFWGIDETDVEPCCWMTYRQH
	KCNC3		GKIVINVGGVRHETYRSTLRTLPGTRLAGLTEPEAAARFDYDPGADEFFFDRHPGVFAYVLNYYRTGKLHCPADVCGPLFEEELGFWGIDETDVEACCWMTYRQH
	KCNC4		EKIIINVGGTRHETYRSTLRTLPGTRLAWLADPDGGGRPETDGGGVGSSGSSGGGGCEFFFDRHPGVFAYVLNYYRTGKLHCPADVCGPLFEEELTFWGIDETDVEPCCWMTYRQH
	KCND1		EVLVVNVSGRRFETWKNTLDRYPDTLLGSSEKEFFYDADSGEYFFDRDPDMFRHVLNFYRTGRLHCPRQECIQAFDEELAFYGLVPELVGDCCLEEYRDR
	KCND2		ALIVLNVSGTRFQTWQDTLERYPDTLLGSSERDFFYHPETQQYFFDRDPDIFRHILNFYRTGKLHYPRHECISAYDEELAFFGLIPEIIGDCCYEEYKDR
	KCND3		ELIVLNVSGRRFQTWRTTLERYPDTLLGSTEKEFFFNEDTKEYFFDRDPEVFRCVLNFYRTGKLHYPRYECISAYDDELAFYGILPEIIGDCCYEEYKDR
	KCNF1		IEIVVNVGGVRQVLYGDLLSQYPETRLAELINCLAGGYDTIFSLCDDYDPGKREFYFDRDPDAFKCVIEVYYFGEVHMKKGICPICFKNEMDFWKVDLKFLDDCCKSHLSEKR
	KCNG1		RRIIINVGGIKYSLPWTTLDEFPLTRLGQLKACTNFDDILNVCDDYDVTCNEFFFDRNPGAFGTILTFLRAGKLRLLREMCALSFQEELLYWGIAEDHLDGCCKRRYLQK
	KCNG2	KCNF2	RHVIINVGGCRVRLAWAALARCPLARLERLRACRGHDDLLRVCDDYDVSRDEFFFDRSPCAFRAIVALLRAGKLRLLRGPCALAFRDELAYWGIDEARLERCCLRRLRR
	KCNG3		ASVVLNVGGARYSLSRELLKDFPLRRVSRLHGCRSERDVLEVCDDYDRERNEYFFDRHSEAFGFILLYVRGHGKLRFAPRMCELSFYNEMIYWGLEGAHLEYCCQRRLDDR
	KCNG4		KEILINVGGRRYLLPWSTLDRFPLSRLSKLRLCRSYEEIVQLCDDYDEDSQEFFFDRSPSAFGVIVSFLAAGKLVLLQEMCALSFQEELAYWGIEEAHLERCCLRKLLRK
	KCNRG		ELVTLNVGGKIFTTRFSTIKQFPASRLARMLDGRDQEFKMVGGQIFVDRDGDLFSFILDFLRTHQLLLPTEFSDYLRLQREALFYELRSLVDLLNPYLLQPR
	KCNS1		EALRVNVGGVRRQLSARALARFPGTRLGRLQAAASEEQARRLCDDYDEAAREFYFDRHPGFFLSLLHFYRTGHLHVLDELCVFAFGQEADYWGLGENALAACCRARYLER
	KCNS2		GEIRINVGGFKRRLRSHTLLRFPETRLGRLLLCHSREAILELCDDYDDVQREFYFDRNPELFPYVLHFYHTGKLHVMAELCVFSFSQEIEYWGINEFFIDSCCSYSYHGR
	KCNS3		ELVNLNVGGFKQSVDQSTLLRFPHTRLGKLLTCHSEEAILELCDDYSVADKEYYFDRNPSLFRYVLNFYYTGKLHVMEELCVFSFCQEIEYWGINELFIDSCCSNRYQER
	KCNV1	KCNB3	DCFTVNVGGSRFVLSQQALSCFPHTRLGKLAVVVASYRRPGALAAVPSPLELCDDANPVDNEYFFDRSSQAFRYVLHYYRTGRLHVMEQLCALSFLQEIQYWGIDELSIDSCCRDRYFR
	KCTD11	KCASH1	GHYFIDRDGKAFRHILNFLRLGRLDLPRGYGETALLRAEADFYQIRPLL
	KCTD12		DIVELNVGGQVYVTRRCTVVSVPDSLLWRMFTQQQPQELARDSKGRFFLDRDGFLFRYILDYLRDLQLVLPDYFPERSRLQREAEYFELPELVRRLGAPQQPGP
	KCTD13	BACURD1	YVKLNVGGSLHYTTLRTLTGQDTMLKAMFSGRVEVLTDAGGWVLIDRSGRHFGTILNYLRDGSVPLPESTRELGELLGEARYYLVQGLIEDCQLAL
	KCTD14		TVVELNVGGEFHTTTLGTLRKFPGSKLAEMFSSLAKASTDAEGRFFIDRPSTYFRPILDYLRTGQVPTQHIPEVYREAQFYEIKPLVKLLEDMPQIFG
	KCTD17		KWVRLNVGGTVFLTTRQTLCREQKSFLSRLCQGEELQSDRDETGAYLIDRDPTYFGPILNFLRHGKLVLDKDMAEEGVLEEAEFYNIGPLIRIIKDRMEEKD
	KCTD18		DVLRLNVGGCIYTARRESLCRFKDSMLASMFSGRFPLKTDESGACVIDRDGRLFKYLLDYLHGEVQIPTDEQTRIALQEEADYFGIPYPYSLSDHLANEME
	KCTD19		IKVYVGSHWYATTLQTLLKYPELLSNPQRVYWITYGQTLLIHGDGQMFRHILNFLRLGKLFLPSEFKEWPLFCQEVEEYHIPSLSEALAQC
	KCTD1		VHIDVGGHMYTSSLATLTKYPESRIGRLFDGTEPIVLDSLKQHYFIDRDGQMFRYILNFLRTSKLLIPDDFKDYTLLYEEAKYFQLQPMLLEMERW
	KCTD2		RWVRLNVGGTYFVTTRQTLGREPKSFLCRLCCQEDPELDSDKDETGAYLIDRDPTYFGPILNYLRHGKLIITKELAEEGVLEEAEFYNIASLVRLVKERIRDNE
	KCTD20		EKVTLLVDGTRFVVNPQIFTAHPDTMLGRMFGPGREYNFTRPNEKGEYEIAEGISATVFRTVLDYYKTGIINCPDGISIPDLRDTCDYLCINFDFNTIRCQDLSAL
	KCTD21	KCASH2	DPITLNVGGKLYTTSLATLTSFPDSMLGAMFSGKMPTKRDSQGNCFIDRDGKVFRYILNFLRTSHLDLPEDFQEMGLLRREADFYQVQPLIEALQEKE
	KCTD3		EIVQLNVGGTRFSTSRQTLMWIPDSFFSSLLSGRISTLRDETGAIFIDRDPAAFAPILNFLRTKELDLRGVSINVLRHEAEFYGITPLVRRLLLCEELERS
	KCTD4		TLMTLNVGGYLYITQKQTLTKYPDTFLEGIVNGKILCPFDADGHYFIDRDGLLFRHVLNFLRNGELLLPEGFRENQLLAQEAEFFQLKGLAEEVKSRWEKEQ
	KCTD5		KWVRLNVGGTYFLTTRQTLCRDPKSFLYRLCQADPDLDSDKDETGAYLIDRDPTYFGPVLNYLRHGKLVINKDLAEEGVLEEAEFYNITSLIKLVKDKIRERD
	KCTD6		EVVELNVGGQVYFTRHSTLISIPHSLLWKMFSPKRDTANDLAKDSKGRFFIDRDGFLFRYILDYLRDRQVVLPDHFPEKGRLKREAEYFQLPDLVKLLTPDEIKQS
	KCTD7		EVVPLNIGGAHFTTRLSTLRCYEDTMLAAMFSGRHYIPTDSEGRYFIDRDGTHFGDVLNFLRSGDLPPRERVRAVYKEAQYYAIGPLLEQLENMQPLKG
	KCTD8		EVVELNVGGQVYVTKHSTLLSVPDSTLASMFSPSSPRGGARRRGELPRDSRARFFIDRDGFLFRYVLDYLRDKQLALPEHFPEKERLLREAEYFQLTDLVKLLSPKVTKQN
	KCTD9	BTBD27	DWLTLNVGGRYFTTTRSTLVNKEPDSMLAHMFKDKGVWGNKQDHRGAFLIDRSPEYFEPILNYLRHGQLIVNDGINLLGVLEEARFFGIDSLIEHLEVAIKNSQ
	KCTD10	BTBD28	YVKLNVGGALYYTTMQTLTKQDTMLKAMFSGRMEVLTDSEGWILIDRCGKHFGTILNYLRDGAVPLPESRREIEELLAEAKYYLVQGLVEECQAALQNK
	KLHL19	KEAP1	CDVTLQVKYQDAPAAQFMAHKVVLASSSPVFKAMFTNGLREQGMEVVSIEGIHPKVMERLIEFAYTASISMGEKCVLHVMNGAVMYQIDSVVRACSDFLVQQL
	KLHL1		CDVILIVGNRKIPAHRLVLSSVSDYFAAMFTSDVCEAKQEEIKMEGIDPNALWDLVQFAYTGCLELKEDTIENLLAAACLLQLPQVVEVCCHFLMKLL
	KLHL10		CDVVIKVNGFEFSAHKNILCSCSSYFRALFTSGWNNTEKKVYNIPGISPDMMKLIIEYAYTRTVPITPDNVEKLLAAADQFNIMGIVRGCCEFLKSEL
	KLHL11		CDITLCFGGAGGREFRAHRSVLAAATEYFTPLLSGQFSESRSGRVEMRKWSSEPGPEPDTVEAVIEYMYTGRIRVSTGSVHEVLELADRFLLIRLKEFCGEFLKKKL
	KLHL12		MNSLRKSNTLCDVTLRVEQKDFPAHRIVLAACSDYFCAMFTSELSEKGKPYVDIQGLTASTMEILLDFVYTETVHVTVENVQELLPAACLLQLKGVKQACCEFL
	KLHL13		CDVTLMPGDTDDAFPVHRVMMASASDYFKAMFTGGMKEQDLMCIKLHGVSKVGLRKIIDFIYTAKLSLNMDNLQDTLEAASFLQILPVLDFCKVFLISGV
	KLHL14		CDVTLTAQGQQFHCHKAVLASCSQYFRSLFSSHPPLGGGVGGQDGLGAPKDQQQPPQQQPSQQQQPPPQEEPGTPSSSPDDKLLTSPRAINNLVLQGCSSIGLRLVLEYLYTANVTLSLDTVEEVLSVSKILHIPQVTKLCVQFLNDQI
	KLHL15		LDVTLVIEDHQFQAHKALLATQSDYFRIMFTADMRERDQDKIHLKGLTATGFSHVLQFMYYGTIELSMNTVHEILQAAMYVQLIEVVKFCCSFLLAKI
	KLHL16	GAN	CDAHLVLDGEEIPVQKNILAAASPYIRTKLNYNPPKDDGSTYKIELEGISVMVMREILDYIFSGQIRLNEDTIQDVVQAADLLLLTDLKTLCCEFLEGCI
	KLHL17		CDIVLHVAAKEIRAHKVVLASCSPYFHAMFTNEMSESRQTHVTLHDIDPQALDQLVQFAYTAEIVVGEGNVQTLLPAASLLQLNGVRDACCKFLLSQL
	KLHL18		MEEIRRQGKLCDVTLKIGDHKFSAHRIVLAASIPYFHAMFTNDMMECKQDEIVMQGMDPSALEALINFAYNGNLAIDQQNVQSLLMGASFLQLQSIKDACCTFL
	KLHL2	MAYVEN	CDVTIVAEDMEISAHRVVLAACSPYFHAMFTGEMSESRAKRVRIKEVDGWTLRMLIDYVYTAEIQVTEENVQVLLPAAGLLQLQDVKKTCCEFLESQL
	KLHL20		CDVVLVVGAKKIYAHRVILSACSPYFRAMFTGELAESRQTEVVIRDIDERAMELLIDFAYTSQITVEEGNVQTLLPAACLLQLAEIQEACCEFLKRQL
	KLHL21		LDVTLEAAGGRDFPAHRAVLAAASPYFRAMFAGQLRESRAERVRLHGVPPDMLQLLLDFSYTGRVAVSGDNAEPLLRAADLLQFPAVKEACGAFLQQQL
	KLHL22		FDVVLVVEGRHIEAHRILLAASCDYFRGMFAGGLKEMEQEEVLIHGVSYNAMCQILHFIYTSELELSLSNVQETLVAACQLQIPEIIHFCCDFLMSWV
	KLHL23		TDITLQCPSGIIFHCHRAVLAACSNYFKAMFTADMKEKFKNKIKLSGIHHDILEGLVNYAYTSQIEITKRNVQSLLEAADLLQFLSVKKACERFLVRHL
	KLHL24		TDVIICVEGKEFPCHRAVLSACSSYFRAMFCNDHRESREMLVEINGILAEAMECFLQYVYTGKVKITTENVQYLFETSSLFQISVLRDACAKFLEEQL
	KLHL25		TDVTLWAGDRAFPCHRAVLAASSRYFEAMFSHGLRESRDDTVNFQDNLHPEVLELLLDFAYSSRIAINEENAESLLEAGDMLQFHDVRDAAAEFLEKNL
	KLHL26		LDVVLTINREAFPAHKVVLAACSDYFRAMFTGGMREASQDVIELKGVSARGLRHIIDFAYSAEVTLDLDCVQDVLGAAVFLQMLPVVELCEEFLKAAM
	KLHL27	IPP	CDVQLQVGQESFKAHRLVLAASSPYFAALFTGGMKESSKDVVPILGIEAGIFQILLDFIYTGIVNIGVNNVQELIIAADMLQLTEVVHLCCEFLKGQI
	KLHL28	BTBD5	LNLLRQHHELCDIILRVGDVKIHAHKVVLASVSPYFKAMFTGNLSEKENSEVEFQCIDETALQAIVEYAYTGTVFISQDTVESLLPAANLLQIKLVLKECCAFL
	KLHL29	KBTBD9	TDLKIVVEGREFEVHQNVLASCSLYFKDLIQRSVQDSGQGGREKLELVLSNLQADVLELLLEFVYTGSLVIDSANAKTLLEAASKFQFHTFCKVCVSFLEKQL
	KLHL3		CDVMIVAEDVEIEAHRVVLAACSPYFCAMFTGDMSESKAKKIEIKDVDGQTLSKLIDYIYTAEIEVTEENVQVLLPAASLLQLMDVRQNCCDFLQSQL
	KLHL30		LQRLRSQPKLADVTLLVGGRELPCHRGLLALSSPYFHAMFAGDFAESFSARVELRDVEPAVVGQLVDFVYTGRLTITQGNVEALTRTAARLHFPSVQKVCGRYLQ
	KLHL31	KBTBD1	CDLVIGTKTKSFDVHKSVMASCSEYFYNILKKDPSIQRVDLNDISPLGLATVIAYAYTGKLTLSLYTIGSIISAAVYLQIHTLVKMCSDFLIREM
	KLHL32		CDITLIAEEQKFHAHKAVLAACSDYFRAMFSLCMVESGADEVNLHGVTSLGLKQALEFAYTGQILLEPGVIQDVLAAGSHLQLLELLNLCSHYLIQEL
	KLHL33		QRLREQRLLLDEEVSVAGRVYGVHRVILAAISSLFRDRLLGGGGPRPPFSLEVSPGGWEAVLTFAYEGVLGPASQGDVLAAAEALGAPRVKAAAQQTCER
	KLHL34		CDVTLETEGSEFPAHRSLLACSSDYFRALFKSHTQESRARVIHLHVPSAAGLQRLLDFIYTAWLSLSMDTVEDTLEAASYLQVTEALGLCGRYLERQL
	KLHL35		TDVVLRAGGRDFPCHRAALSAGSAYFRSLFAAGRPERGPAVVPVVPVAPEAPGTSPAGAAAALAVVLDYVYGAGVRLRAEDEAAAVLALAERLGVAGLREACVRFLEGRL
	KLHL36		CDVVLVADEQRVPAHRNLLAVCSDYFNSMFTIGMREAFQKEVELIGASYIGLKAVVDFLYGGELVLDGGNIDYVLETAHLLQIWTVVDFCCEYLEQEV
	KLHL37	ENC1	TDVLLHAGNRTFPCHRAVLAACSRYFEAMFSGGLKESQDSEVNFDNSIHPEVLELLLDYAYSSRVIINEENAESLLEAGDMLEFQDIRDACAEFLEKNL
	KLHL38		TDVSICAGAREIPCHRNVLASSSPYFRAMFCSSFREKSEAKVQLKGIDPPTLDQIVSYVYTGEAHIATDNVLPVMEAASMLQFPKLFEACSSYLQSQL
	KLHL39	IVNS1ABP	CDVRLQVCGHEMLAHRAVLACCSPYLFEIFNSDSDPHGISHVKFDDLNPEAVEVLLNYAYTAQLKADKELVKDVYSAAKKLKMDRVKQVCGDYLLSRM
	KLHL4		MENYLKEKQLCDVLLIAGHLRIPAHRLVLSAVSDYFAAMFTNDVLEAKQEEVRMEGVDPNALNSLVQYAYTGVLQLKEDTIESLLAAACLLQLTQVIDVCSNFLI
	KLHL40	KBTBD5	LDCVVRAGEREFPCHRLVLAACSPYFRARFLAEPERAGELHLEEVSPDVVAQVLHYLYTSEIALDEASVQDLFAAAHRFQIPSIFTICVSFLQKRL
	KLHL41	KBTBD1	IDCTLKAGDKSLPCHRLILSACSPYFREYFLSEIDEAKKKEVVLDNVDPAILDLIIKYLYSASIDLNDGNVQDIFALASRFQIPSVFTVCVSYLQKRL
	KLHL42		MVQIRLEDRCYPVSKRKLIEQSDYFRALYRSGMREALSQEAGGPEVQQLRGLSAPGLRLVLDFINAGGAREGWLLGPRGEKGGGVDEDEEMDEVSLLSELVEAASFLQVTSLLQLLLSQVRLNNCLEMYRLAQVYGLPDLQEACLRFMVVHF
	KLHL5		MENYLRHKQLCDVILVAGDRRIPAHRLVLSSVSDYFAAMFTNDVREARQEEIKMEGVEPNSLWSLIQYAYTGRLELKEDNIECLLSTACLLQLSQVVEACCKFL
	KLHL6		TDVILCVDIQEFSCHRVVLAAASNYFRAMFCNDLKEKYEKRIIIKGVDAETMHTLLDYTYTSKALITKQNVQRVLEAANLFQFLRMVDACASFLTEAL
	KLHL7		CDVILMVQERKIPAHRVVLAAASHFFNLMFTTNMLESKSFEVELKDAEPDIIEQLVEFAYTARISVNSNNVQSLLDAANQYQIEPVKKMCVDFLKEQV
	KLHL8		CDVTLKVGSKLISCHKLVLACVIPYFRAMFLSEMAEAKQTLIEIRDFDGDAIEDLVKFVYSSRLTLTVDNVQPLLYAACILQVELVARACCEYMKLHF
	KLHL9		CDVTLVPGDGDEIFPVHRAMMASASDYFKAMFTGGMKEQDLMCIKLHGVNKVGLKKIIDFIYTAKLSLNMDNLQDTLEAASFLQILPVLDFCKVFLISGV
	RCBTB1		ADLKFRIDGKYIHVHKAVLKIRCEHFRSMFQSYWNEDMKEVIEIDQFSYPVYRAFLQYLYTDTVDLPPEDAIGLLDLATSYCENRLKKLCQHIIKRGI
	RCBTB2		DLKFLVDGKYIYAHKVLLKIRCEHFRSSLEDNEDDIVEMSEFSYPVYRAFLEYLYTDSISLSPEEAVGLLDLATFYRENRLKKLCQQTIKQGI
	RHOBTB1		ADVLFILQDQEHIFAHRIYLATSSSKFYDLFLMECEESPNGSEGACEKEKQSRDFQGRILSVDPEEEREEGPPRIPQADQWKSSNKSLVEALGLEAEGAVPETQTLTGWSKGFIGMHREMQVNPISKRMGPMTVVRMDASVQPGPFRTLLQFLYTGQLDEKEKDLVGLAQIAEVLEMFDLRMMVENIMNKEA
	RHOBTB2		ADVILVLQERVRIFAHKIYLSTSSSKFYDLFLMDLSEGELGGPSEPGGTHPEDHQGHSDQHHHHHHHHHGRDFLLRAASFDVCESVDEAGGSGPAGLRASTSDGILRGNGTGYLPGRGRVLSSWSRAFVSIQEEMAEDPLTYKSRLMVVVKMDSSIQPGPFRAVLKYLYTGELDENERDLMHIAHIAELLEVFDLRMMVANILNNEA
	RHOBTB3		VDVVFYNPNLKKVVEAHKIVLCAVSHVFMLLFNVKSPTDIQDSSIIRTTQDLFAINRDTAFPGASHESSGNPPLRVIVKDALFCSCLSDILRFIYSGAFQWEELEEDIRKKLKDSGDVSNVIEKVKCILKTPG
	SH3KBP1		EVIHLNVGGKRFSTSRQTLTWIPDSFFSSLLSGRISTLKDETGAIFIDRDPTVFAPILNFLRTKELDPRGVHGSSLLHEAQFYGLTPLVRRLQLREELDR
	ZBTB19	PATZ1	CDVLLRVGDESFPAHRAVLAACSEYFESVFSAQLGDGGAADGGPADVGGATAAPGGGAGGSRELEMHTISSKVFGDILDFAYTSRIVVRLESFPELMTAAKFLLMRSVIEICQEVIKQSN
	ZBTB10	RINZF	CDVSIVVSGKIFKAHKNILVAGSRFFKTLYCFSNKESPNQNNTTHLDIAAVQGFSVILDFLYSGNLVLTSQNAIEVMTVASYLQMSEVVQTCRNFIKDAL
	ZBTB1		CDCCIAIDDIYFQAHKAVLAACSSYFRMFFMNHQHSTAQLNLSNMKISAECFDLILQFMYLGKIMTAPSSFEQFKVAMNYLQLYNVPDCLEDIQDADC
	ZBTB11		CDVTLLIEGEEYKAHKSVLSANSEYFRDLFIEKGAVSSHEAVVDLSGFCKASFLPLLEFAYTSVLSFDFCSMADVAILARHLFMSEVLEICESVHKLME
	ZBTB12		CDVTIVADSLKFRGHKVILAACSPFLRDQFLLNPSSELQVSLMHSARIVADLLLSCYTGALEFAVRDIVNYLTAASYLQMEHVVEKCRNALSQFI
	ZBTB14		CDIAIVVEDVKFRAHRCVLAACSTYFKKLFKKLEVDSSSVIEIDFLRSDIFEEVLNYMYTAKISVKKEDVNLMMSSGQILGIRFLDKLCSQKRDVSS
	ZBTB16		CDVVIMVDSQEFHAHRTVLACTSKMFEILFHRNSQHYTLDFLSPKTFQQILEYAYTATLQAKAEDLDDLLYAAEILEIEYLEEQCLKMLETIQ
	ZBTB17		CDCTFVVDGVHFKAHKAVLAACSEYFKMLFVDQKDVVHLDISNAAGLGQVLEFMYTAKLSLSPENVDDVLAVATFLQMQDIITACHALKSLA
	ZBTB18	TAZ1, ZNF238	LSEQRHQGFLCDCTVLVGDAQFRAHRAVLASCSMYFHLFYKDQLDKRDIVHLNSDIVTAPAFALLLEFMYEGKLQFKDLPIEDVLAAASYLHMYDIV
	ZBTB2		CDCTVAIGDVYFKAHKSVLASFSNYFKMLFVHQTSECVRLKPTDIQPDIFSYLLHLMYTGKMAPQLIDPVRLEQGIKFLHAYPLIQEASLASQG
	ZBTB20		CDVTVRIHGSMLRAHRCVLAAGSPFFQDKLLLGYSDIEIPSVVSVQSVQKLIDFMYSGVLRVSQSEALQILTAASILQIKTVIDECTRIVSQNV
	ZBTB21		CDVLLIVGDQKFRAHKNVLAASSEYFQSLFTNKENESQTVFQLDFCEPDAFDNVLNYIYSSSLFVEKSSLAAVQELGYSLGISFLTNIVSKTPQAPF
	ZBTB22	BING1	LNQQRLQGQLCDVSIRVQGREFRAHRAVLAASSPYFHDQVLLKGMTSISLPSVMDPGAFETVLASAYTGRLSMAAADIVNFLTVGSVLQMWHIVDKCTELLRE
	ZBTB23	GZF1	CDVTVSVEYQGVRKDFMAHKAVLAATSKFFKEVFLNEKSVDGTRTNVYLNEVQVADFASFLEFVYTAKVQVEEDRVQRMLEVAEKLKCLDLSETCFQLKKQML
	ZBTB24		CDITLIVENVHFRAHKALLAASSEYFSMMFAEEGEIGQSIYMLEGMVADTFGILLEFIYTGYLHASEKSTEQILATAQFLKVYDLVKAYTDFQNNHS
	ZBTB25	ZNF46, KUP	LNMQREFGFLCDCTVAIGDVYFKAHRAVLAAFSNYFKMIFIHQTSECIKIQPTDIQPDIFSYLLHIMYTGKGPKQIVDHSRLEEGIRFLHADYLSHIATEM
	ZBTB26	ZNF481	MNKLREENKFCDVTVLIDDIEVQGHKIVFAAGSPFLRDQFLLNDSREVKISILQSSEVGRQLLLSCYSGVLEFPEMELVNYLTAASFLQMSHIVERCTQAL
	ZBTB27	BCL6	TDVVIVVSREQFRAHKTVLMACSGLFYSIFTDQLKCNLSVINLDPEINPEGFCILLDFMYTSRLNLREGNIMAVMATAMYLQMEHVVDTCRKFIKASE
	ZBTB28	BCL6B	LNELRLRGILTDVTLLVGGQPLRAHKAVLIACSGFFYSIFRGRAGVGVDVLSLPGGPEARGFAPLLDFMYTSRLRLSPATAPAVLAAATYLQMEHVVQACHRFIQAS
	ZBTB29	HIC1	CDVIIVVQNALFRAHKNVLAASSAYLKSLVVHDNLLNLDHDMVSPAVFRLVLDFIYTGRLADGAEAAAAAAVAPGAEPSLGAVLAAASYLQIPDLVALCKKRLKRHG
	ZBTB3		CDCTVMVGSTQFLAHRAVLASCSPFFQLFYKERELDKRDLVCIHNEIVTAPAFGLLLDFMYAGQLTLRGDTPVEDVLAAASYLHMNDIVKVCKRRLQARA
	ZBTB30	HIC2	CDVIIMVENSIFRAHKNVLAASSIYFKSLVLHDNLINLDTDMVSSTVFQQILDFIYTGKLLPSDQPAEPNFSTLLTAASYLQLPELAALCRRKLKRAG
	ZBTB31	MYNN	CDCTIVIGEFQFKAHRNVLASFSEYFGAIYRSTSENNVFLDQSQVKADGFQKLLEFIYTGTLNLDSWNVKEIHQAADYLKVEEVVTKCKIKMEDFA
	ZBTB32		CDTLITVGSQEFPAHSLVLAGVSQQLGRRGQWALGEGISPSTFAQLLNFVYGESVELQPGELRPLQEAARALGVQSLEEACWRARGDRA
	ZBTB33	ZNF348, KAISO	LNEQRGHGLFCDVTVIVEDRKFRAHKNILSASSTYFHQLFSVAGQVVELSFIRAEIFAEILNYIYSSKIVRVRSDLLDELIKSGQLLGVKFIAEL
	ZBTB34	ZNF918	LNELRLQGKLCDIIVHIQGQPFRAHKAVLAASSPYFRDHSALSTMSGLSISVIKNPNVFEQLLSFCYTGRMSLQLKDVVSFLTAASFLQMQCVIDKCTQIL
	ZBTB35	ZNF131	TDITLIVDGHHFKAHKAVLAACSKFFYKFFQEFTQEPLVEIEGVSKMAFRHLIEFTYTAKLMIQGEEEANDVWKAAEFLQMLEAIKALEVRNKENS
	ZBTB38		LNEQRIRGILCDVTIIVEDTKFKAHSNVLAASSLYFKNIFWSHTICISSHVLELDDLKAEVFTEILNYIYSSTVVVKRQETVTDLAAAGKKLGISFLEDL
	ZBTB39		CDVTIVVGSRSFPAHKAVLACAAGYFQNLFLNTGLDAARTYVVDFITPANFEKVLSFVYTSELFTDLINVGVIYEVAERLGMEDLLQACHSTFPDLE
	ZBTB4		CDVTLIAGDTKFPAHRSVLAASSPFFREALLTSAPLPLPPATGGAAPNPATTTAASSSSSSSSSSSSSSSSASSSSSSSSSSPPPASPPASSPPRVLELPGVPAAAFSDVLNFIYSARLALPGGGGDGAAVAEIGALGRRLGISRLQGLGEGGDAWVP
	ZBTB40		CDCTISIGTIYFRAHKLVLAAASLLFKTLLDNTDTISIDASVVSPEEFALLLEMMYTGKLPVGKHNFSKIISLADSLQMFDVAVSCKNLLTSLV
	ZBTB41		CDLLIIVEGKEFSAHKVVVAVGSSYFHACLSKNPSTDVVTLDHVTHSVFQHLLEFLYTSEFFVYKYEIPLVLEAAKFLDIIDAVKLLNNENVAPFH
	ZBTB42		CDCTVLVGDARFPAHRAVLAACSVYFHLFYRDRPAGSRDTVRLNGDIVTAPAFGRLLDFMYEGRLDLRSLPVEDVLAAASYLHMYDIVKVCKGRLQEKD
	ZBTB43		CDVSIVVQGHIFRAHKAVLAASSPYFCDQVLLKNSRRIVLPDVMNPRVFENILLSSYTGRLVMPAPEIVSYLTAASFLQMWHVVDKCTEVLEGNP
	ZBTB45		CDVTVRIREASLRAHRCVLAAGSPFFQDKLLLGHSEIRVPPVVPAQTVRQLVEFLYSGSLVVAQGEALQVLTAASVLRIQTVIDECTQIIARAR
	ZBTB46	BTBD4	CDVCVVVEGKVFKAHKNVLLGSSRYFKTLYCQVQKTSEQATVTHLDIVTAQGFKAIIDFMYSAHLALTSRNVIEVMSAASFLQMTDIVQACHDFIKAAL
	ZBTB47		LNEQRLFQPDLCDVDLVLVPQRSVFPAHKGVLAAYSQFFHSLFTQNKQLQRVELSLEALAPGGLQQILNFIYTSKLLVNAANVHEVLSAASLLQMADIAASCQELLD
	ZBTB48		CDATLDVGGLVFKAHWSVLACCSHFFQSLYGDGSGGSVVLPAGFAEIFGLLLDFFYTGHLALTSGNRDQVLLAARELRVPEAVELCQSFKPKTS
	ZBTB49		CDCMLVVKGVCFKAHKNVLAAFSQYFRSLFQNSSSQKNDVFHLDVKNVSGIGQILDFMYTSHLDLNQDNIQVMLDTAQCLQVQNVLSLCHTFLKSAT
	ZBTB5		CDCVIVVGNRHFKAHRSVLAACSTHFRALFSVAEGDQTMNMIQLDSEVVTAEAFAALIDMMYTSTLMLGESNVMDVLLAASHLHLNSVVKACKHYLTTRT
	ZBTB6	ZNF482	MNLLRQQNLFCDVSIYINDTEFQGHKVILAACSTFMRDQFLLTQSKHVRITILQSAEVGRKLLLSCYTGALEVKRKELLKYLTAASYLQMVHIVEKCTEALSKYL
	ZBTB7A	ZNF857A	LNEQRTQGLLCDVVILVEGREFPTHRSVLAACSQYFKKLFTSGAVVDQQNVYEIDFVSAEALTALMDFAYTATLTVSTANVGDILSAARLLEIPAVSHVCADLLDRQI
	ZBTB7B	ZBTB15, ZNF857B	LNEQRQLGHLCDLTIRTQGLEYRTHRAVLAACSHYFKKLFTEGGGGAVMGAGGSGTATGGAGAGVCELDFVGPEALGALLEFAYTATLTTSSANMPAVLQAARLLEIPCVIAACMEILQGS
	ZBTB7C	ZBTB36	CDVLLVVQEQEYRTHRSVLAACSKYFKKLFTAGTLASQPYVYEIDFVQPEALAAILEFAYTSTLTITAGNVKHILNAARMLEIQCIVNVCLEIMEPGG
	ZBTB8A		CDCSILVEGKVFKAHRNVLFASSGYFKMLLSQNSKETSQPTTATFQAFSPDTFTVILDFVYSGKLSLTGQNVIEVMSAASFLQMTDVISVCKTFIKSSL
	ZBTB8B		CDCSIIVEGRIFKAHRNILFANSGYFRALLIHYIQDSGRHSTASLDIVTSDAFSIILDFLYSGKLDLCGENVIEVMSAASYLQMNDVVNFCKTYIRSSL
	ZBTB9		CDVSLLVQGRELRAHKAVLAAASPYFHDKLLLGDAPRLTLPSVIEADAFEGLLQLIYSGRLRLPLDALPAHLLVASGLQMWQVVDQCSEILRELE
	ZBTBD26		CDVTVLIDDIEVQGHKIVFAAGSPFLRDQFLLNDSREVKISILQSSEVGRQLLLSCYSGVLEFPEMELVNYLTAASFLQMSHIVERCTQALWKFI
	ZBTBD37		CDIVVNVQGQAFRAHKVVLAASSPYFRDHMSLNEMSTVSISVIKNPTVFEQLLSFCYTGRICLQLADIISYLTAASFLQMQHIIDKCTQILEGIH
	ZBTBD6		CDVSIYINDTEFQGHKVILAACSTFMRDQFLLTQSKHVRITILQSAEVGRKLLLSCYTGALEVKRKELLKYLTAASYLQMVHIVEKCTEALSKYL

## Sheet: Cullin proteins
	gene	alt name	CH-domain
	Cul1		NQVMVVFKYIEDKDVFQKFYAKMLAKRLVHQNSASDDAEASMISKLKQACGFEYTSKLQRMFQDIGVSKDLNEQFKKHLTNSEPLDLDFSIQVLSSGSWPFQQSCTFALPSELERSYQRFTAFYASRHSGRKLTWLYQLSKGELVTNC
	Cul2		TSFITVFKYIDDKDVFQKFYARMLAKRLIHGLSMSMDSEEAMINKLKQACGYEFTSKLHRMYTDMSVSADLNNKFNNFIKNQDTVIDLGISFQIYVLQAGAWPLTQAPSSTFAIPQELEKSVQMFELFYSQHFSGRKLTWLHYLCTGEVKMNY
	Cul3		DKAMVLFRFMQEKDVFERYYKQHLARRLLTNKSVSDDSEKNMISKLKTECGCQFTSKLEGMFRDMSISNTTMDEFRQHLQATGVSLGGVDLTVRVLTTGYWPTQSATPKCNIPPAPRHAFEIFRRFYLAKHSGRQLTLQHHMGSADLNATF
	Cul4a		DKIMILFRFIHGKDVFEAFYKKDLAKRLLVGKSASVDAEKSMLSKLKHECGAAFTSKLEGMFKDMELSKDIMVHFKQHMQNQSDSGPIDLTVNILTMGYWPTYTPMEVHLTPEMIKLQEVFKAFYLGKHSGRKLQWQTTLGHAVLKAEF
	Cul4b		DKIMIIFRFIYGKDVFEAFYKKDLAKRLLVGKSASVDAEKSMLSKLKHECGAAFTSKLEGMFKDMELSKDIMIQFKQYMQNQNVPGNIELTVNILTMGYWPTYVPMEVHLPPEMVKLQEIFKTFYLGKHSGRKLQWQSTLGHCVLKAEF
	Cul5		KEVLLVLKYVQNKDVFMRYHKAHLTRRLILDISADSEIEENMVEWLREVGMPADYVNKLARMFQDIKVSEDLNQAFKEMHKNNKLALPADSVNIKILNAGAWSRSSEKVFVSLPTELEDLIPEVEEFYKKNHSGRKLHWHHLMSNGIITFKN
	Cul7		QIRIKRCQQGGIDTRIRGLEILGPKPTFWPVFREQLCRHTRLFYMVRAQAWSQDMAEDRRSLLHLSSRLNGALRQEQNFADRFLPDDEAAQALGKTCWEALVSPVVQNITSPDEDGISPLGWLLDQYLECQEAVFNPQSRGPAFFSRVRRLTHLLVHVEPCEAPPPVVATPRPKGRNRSHDWSSLATRGLPSSIMRNLTRCWRAVVEKQVNNFLTSSWRDDDFVPRYCEHFNILQNSSSELFGPRAAFLLALQNGCAGALLKLPFLKAAHVSEQFARHIDQQIQGSRIGGAQEMERLAQLQQCLQAVLIFSGLEIATTFEHYYQHYMADRLLGVVSSWLEGAVLEQIGPCFPNRLPQQMLQSLSTSKELQRQFHVYQLQQLDQELLKLEDTEKKIQVGL…
	Cul9	PARC	CQQGGIDTRVRGVEVLGPKPTFWPLFREQLCRRTCLFYTIRAQAWSRDIAEDHRRLLQLCPRLNRVLRHEQNFADRFLPDDEAAQALGKTCWEALVSPLVQNITSPDAEGVSALGWLLDQYLEQRETSRNPLSRAASFASRVRRLCHLLVHVEPPPGPSPEPSTRPFSKNSKGRDRSPAPSPVLPSSSLRNITQCWLSVVQEQVSRFLAAAWRAPDFVPRYCKLYEHLQRAGSELFGPRAAFMLALRSGFSGALLQQSFLTAAHMSEQFARYIDQQIQGGLIGGAPGVEMLGQLQRHLEPIMVLSGLELATTFEHFYQHYMADRLLSFGSSWLEGAVLEQIGLCFPNRLPQLMLQSLSTSEELQRQFHLFQLQRLDKLFLEQEDEEEKRLEEEEEEEEE…

## Sheet: Cullin2-5 substrate adapters
	Cullin-2 substrate adapters				Cullin-5 substrate adapters
	VHL-box				Socs-box
	gene	alt name			gene	alt name	notes
	VHL				CISH	CIS
	LRR1	PPIL5			SOCS1		note that SOCS1 preferentially utilizes Cullin-2
	LRRC14				SOCS2
	LRRC28				SOCS3
	LRRC58				SOCS4
	FEM1A				SOCS5
	FEM1B				SOCS6
	FEM1C				SOCS7
	ZYG11B				WSB1
	ZER1				WSB2
	APPBP2				SPSB3	SSB3
	KLHDC2				SPSB4	SSB4
	KLHDC3				SPSB1	SSB1
	KIAA0913	ZSWIM8			SPSB2	SSB2
	ZSWIM5				ASB1
	ZSWIM6				ASB2
	PRAME				ASB3
					ASB4
					ASB11
					RAB40B
					RAB40C	LA16C-398G5
					LRRC41	MUF1
					RAB40A
					TCEB3	ELOA
					NEURL2	OZZ

## Sheet: Cullin-4 substrate adapters
	putative and validated Cullin-4A/B substrate adapters
	note: list assembled from He et al. PMID 17079684 and Lee & Zou PMID 17588513
	gene	alt names
	AMBRA1	WDR94	DCAF3
	ARPC1A
	ARPC1B
	ATG16L1	APG16L
	BRWD1	DCAF19
	CIAO1	WDR39
	COP1	RFWD2
	COPA
	CRBN	MRT2
	DCAF1	VPRBP
	DCAF10	WDR32
	DCAF11	WDR23
	DCAF12	WDR40A
	DCAF13	WDSOF1
	DCAF15
	DCAF16
	DCAF17
	DCAF4	WDR21A	WDR21
	DCAF5	WDR22
	DCAF6	IQWD1
	DCAF7	WDR68
	DCAF8	WDR42A
	DDA1
	DDB2
	DET1
	DNAI2
	DTL	DCAF2	CTD2
	EED	ESC1
	EIPR1
	EML4
	ERCC8	CSA
	FBXO44
	FBXW1	BTRC	b-TRCP
	FBXW5
	FBXW7
	FBXW8
	FBXW9
	GNB1	Gβ1
	GNB2	Gβ2
	GNB3	Gβ3
	GNB4	Gβ4
	GNB5	Gβ5
	GRWD1
	GTF3C2
	KATNB1
	NLE1
	NUP43
	PAFAH1B1	LIS1
	PAK1IP1
	PEX7
	PHIP	DCAF14
	POC1A	WDR51A
	PRP19	PRPF19
	PWP1
	RAE1
	RBBP4
	RBBP5
	RBBP7
	RPTOR
	SCAP
	SMU1
	SNRNP40	WDR57
	SPAG16
	STRN4
	STXBP5L
	TAF5L
	TBL1X
	TBL1XR1
	TBL1Y
	TBL3
	TEP1
	THOC3
	THOC6	WDR58
	TLE1
	TLE2
	TLE3
	TOR1AIP2	IFRG15
	TRPC4AP	TRUSS
	WDR12	YTM1
	WDR26
	WDR27
	WDR3
	WDR31
	WDR37	NOCGUS
	WDR38
	WDR4	TRM82
	WDR47
	WDR48	SPG60
	WDR5
	WDR51B	POC1B
	WDR53
	WDR59
	WDR5B
	WDR61
	WDR66	CFAP251
	WDR76
	WDR77
	WDR78
	WDR82
	WDR83
	WDR86
	WDR87
	WDR92	HZGJ
	WDTC1	DCAF9
	WSB1
	WSB2
